# Supplementary material for: LncRNA XIST promotes the progression of laryngeal squamous cell carcinoma via sponging miR-125b-5p to modulate TRIB2
Source: Oxford University Press journal article supplement (doi:10.1042/bsr20193172), 2020-03-09
Supplement: bsr-2019-3172_supp.pdf [file bsr-2019-3172_supp.pdf]

repeat 1

**AMC-HN-8**

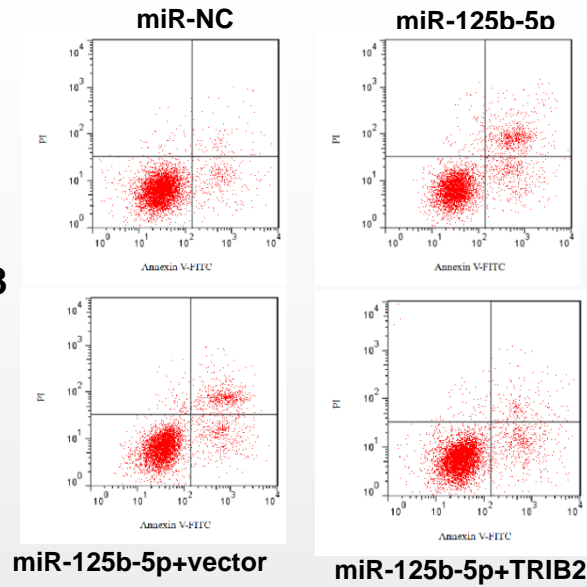

**migration**

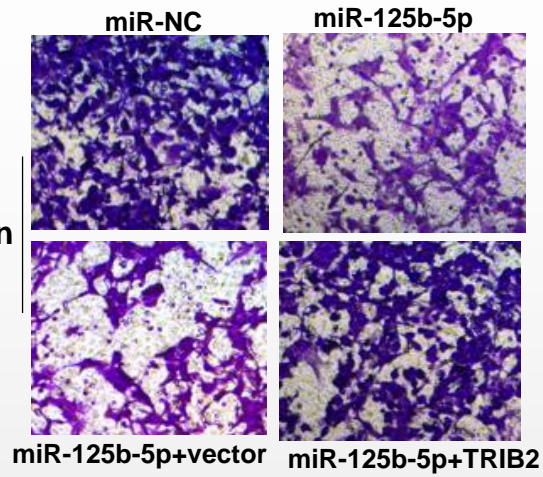

**invasion**

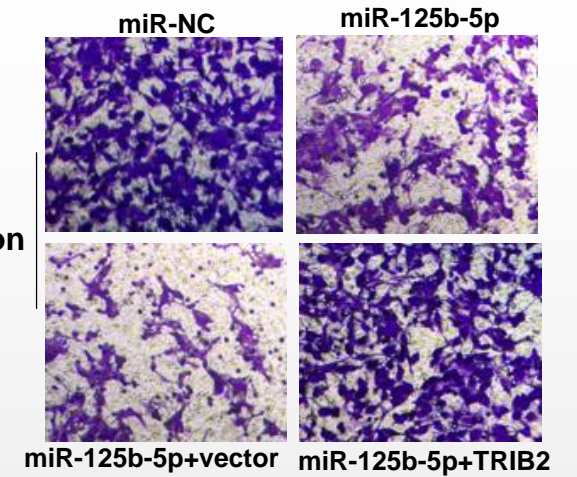

**M4E**

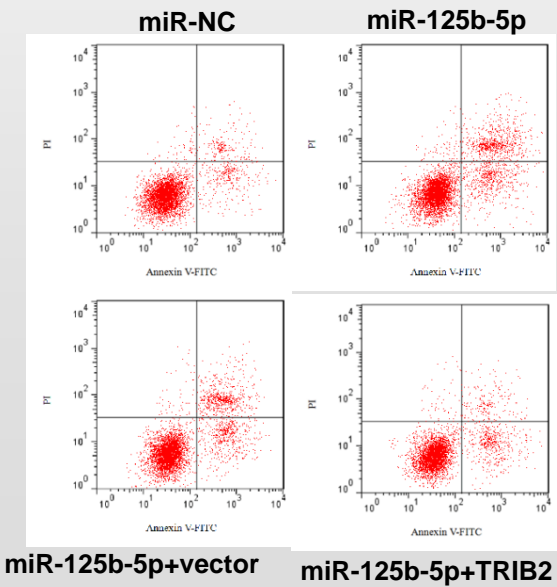

**migration**

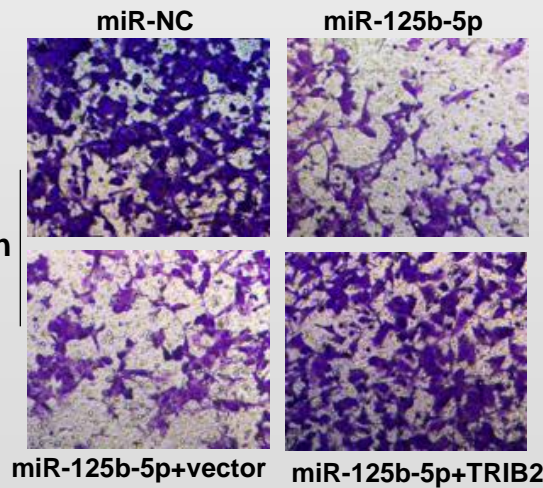

**invasion**

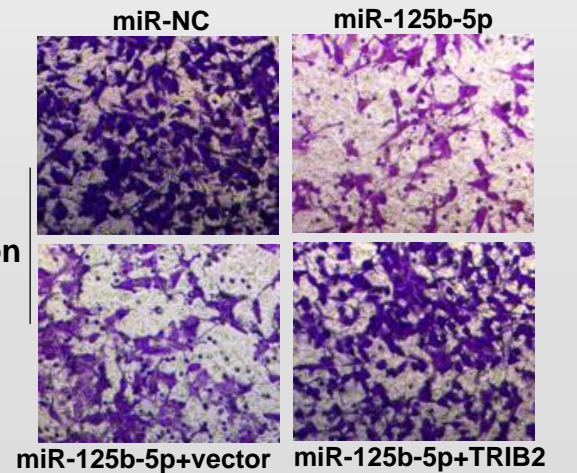

repeat 2

AMC-HN-8

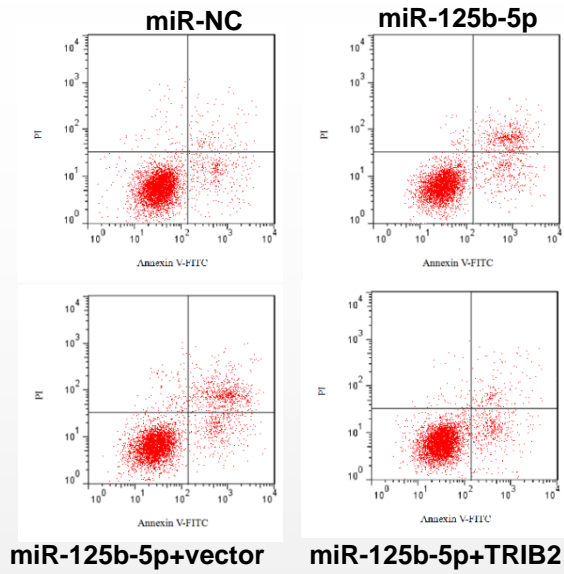

migration

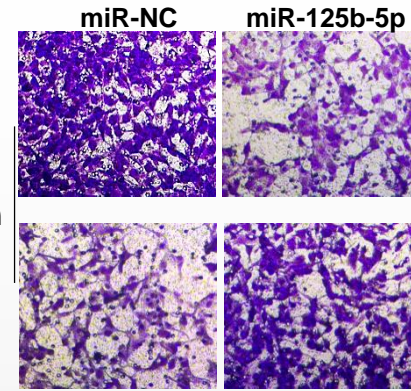

miR-125b-5p+vector miR-125b-5p+TRIB2

invasion

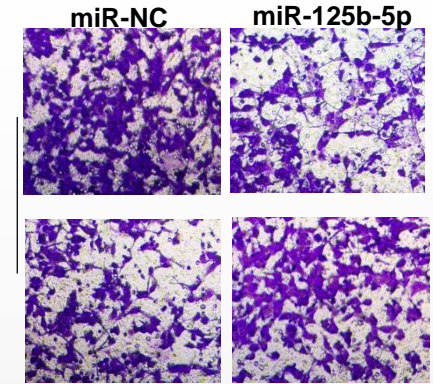

miR-125b-5p+vector miR-125b-5p+TRIB2

M4E

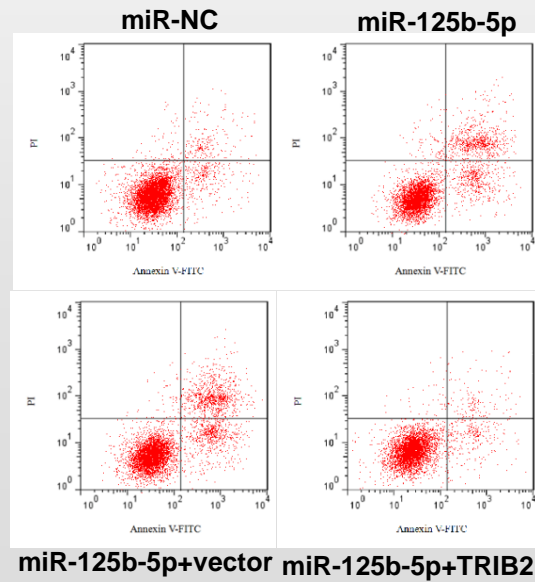

migration

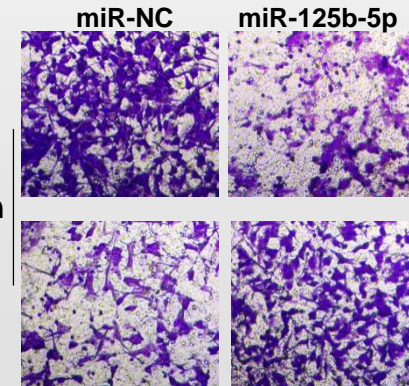

miR-125b-5p+vector miR-125b-5p+TRIB2

invasion

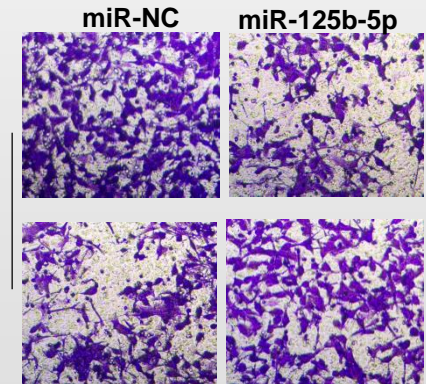

miR-125b-5p+vector miR-125b-5p+TRIB2

repeat 3

AMC-HN-8

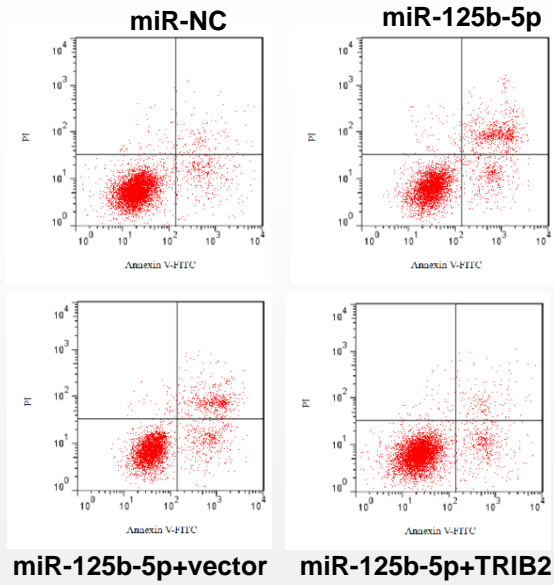

migration

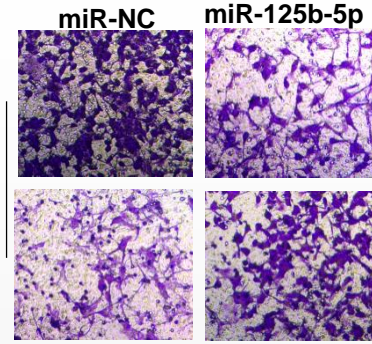

miR-125b-5p+vector miR-125b-5p+TRIB2

invasion

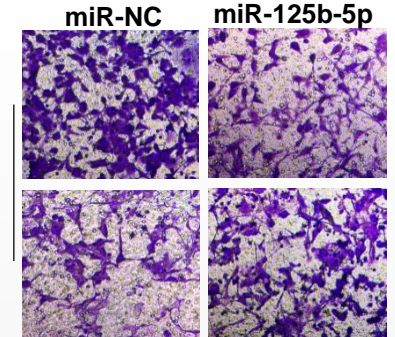

miR-125b-5p+vector miR-125b-5p+TRIB2

M4E

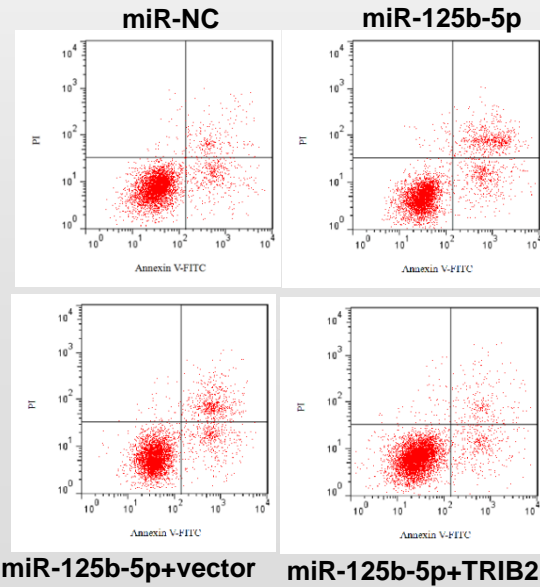

migration

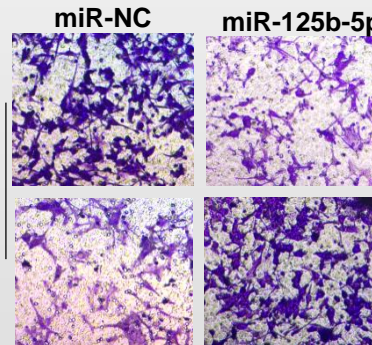

miR-125b-5p+vector miR-125b-5p+TRIB2

invasion

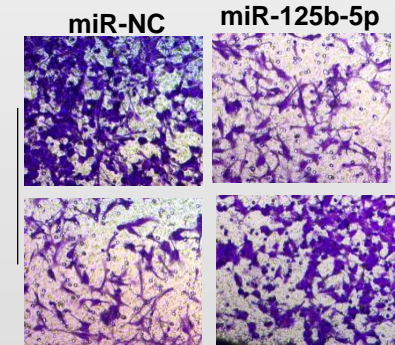

miR-125b-5p+vector miR-125b-5p+TRIB2

**Supplementary Figure 1** MiR-125b-5p depletion attenuated the promoting effect of XIST intervention on the apoptosis and the inhibitory impact on the metastasis of LSCC cells.

**Notes:** LSCC cells were transfected with si-NC, si-XIST, si-XIST + anti-miR-NC or si-XIST + anti-miR-125b-5p. **(A and B)** Flow cytometry was conducted to detect the apoptosis of LSCC cells. **(C and D)** Transwell assay was applied to measure the metastasis of LSCC cells.

\* $P < 0.05$ .

**Supplementary Figure 2** MiR-125b-5p promoted the apoptosis while inhibited the metastasis of LSCC cells via targeting TRIB2.

**Notes:** MiR-NC, miR-125b-5p, miR-125b-5p+vector or miR-125b-5p+TRIB2 vector was separately transfected into AMC-HN-8 and M4E cells. **(A and B)** Flow cytometry was performed to measure the apoptosis of LSCC cells. **(C and D)** Transwell assay was conducted to detect the metastasis of LSCC cells. \* $P < 0.05$ .
